# Supplementary material for: Potential cardiac-derived exosomal miRNAs involved in cardiac healing and remodeling after myocardial ischemia–reperfusion injury
Source: PubMed Central journal article supplement — Sci Rep. 2024 Oct 16;14:24275. doi: 10.1038/s41598-024-75517-8 (PMC11484883; doi:10.1038/s41598-024-75517-8), 2024-10-16
Supplement: 41598_2024_75517_MOESM1_ESM.pdf [file 41598_2024_75517_MOESM1_ESM.pdf]

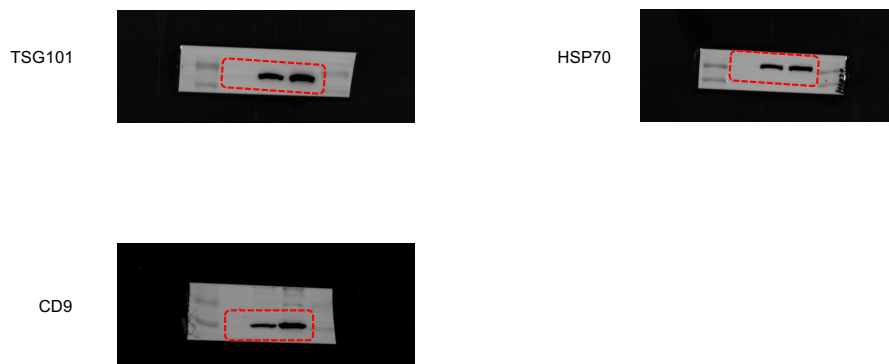

**Supplementary figure 1.** Original image of blots and gels in the article. The original blots were used in figure 3D, please note the blots cut prior to hybridization with antibodies.

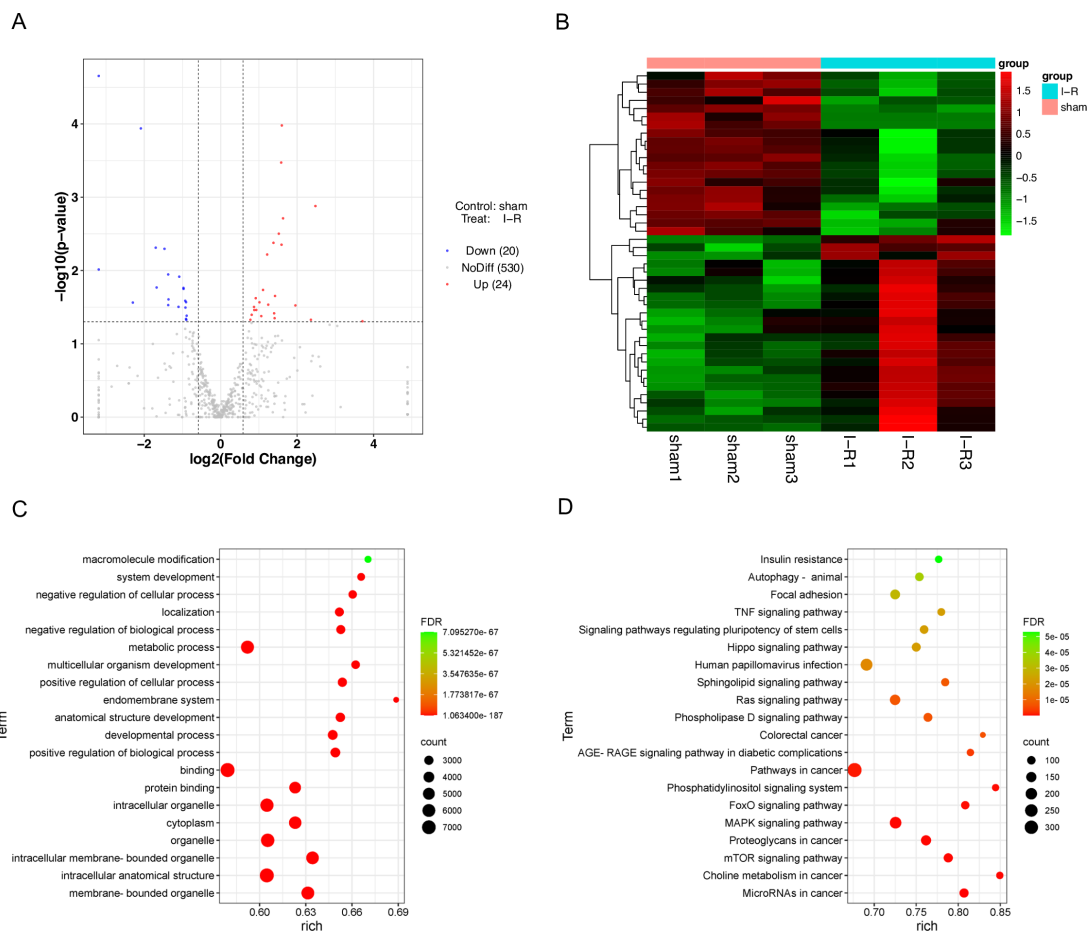

**Supplementary figure 2.** Differential miRNA analysis of myocardial tissue. (A) Volcano map of differentially expressed miRNAs in myocardial tissue. (B) Heatmap. (C) GO analysis. (D) KEGG analysis.

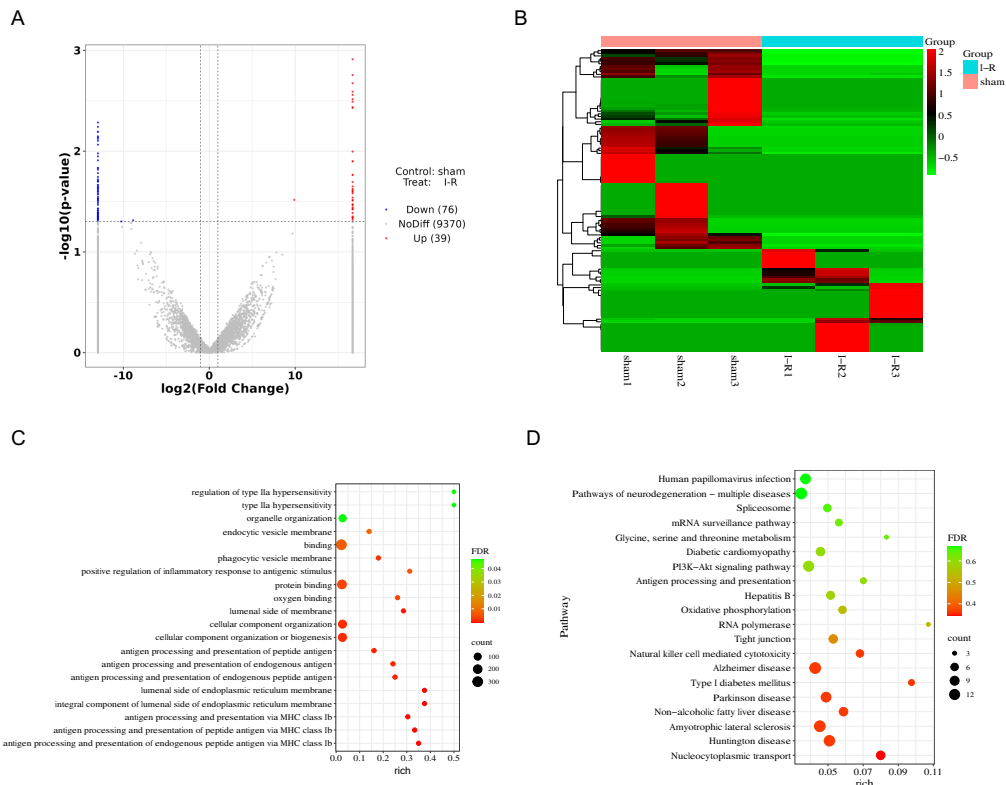

**Supplementary figure 3. Analysis of differentially expressed lncRNAs in myocardial tissue. (A)** Volcano plot of DEG lncRNAs. **(B)** Heatmaps of DEG lncRNAs. **(C)** GO analysis of DEG lncRNAs. **(D)** KEGG analysis of DEG lncRNAs.

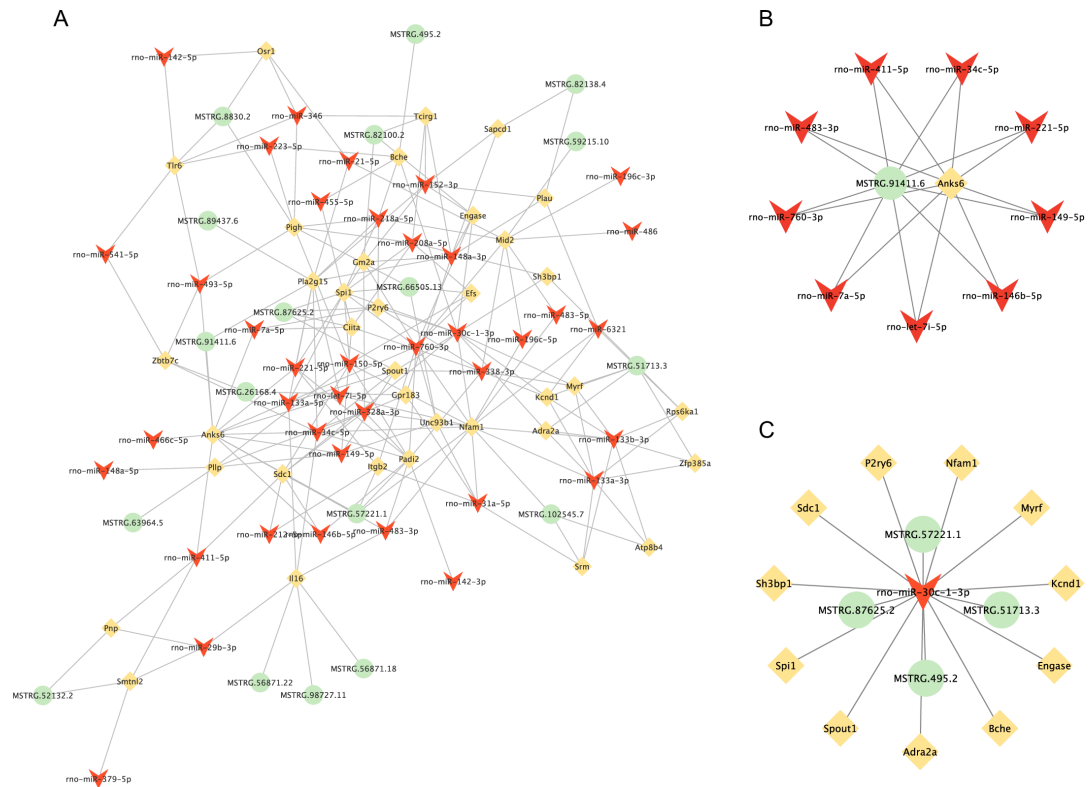

**Supplementary figure 4. The lncRNA–miRNA–mRNA network.** (A) The lncRNA–miRNA–mRNA ceRNA regulatory network. (B) The regulatory network of lncRNA MSTRG.91411.6. (C) The regulatory network of rno-miR-30c-1-3p.

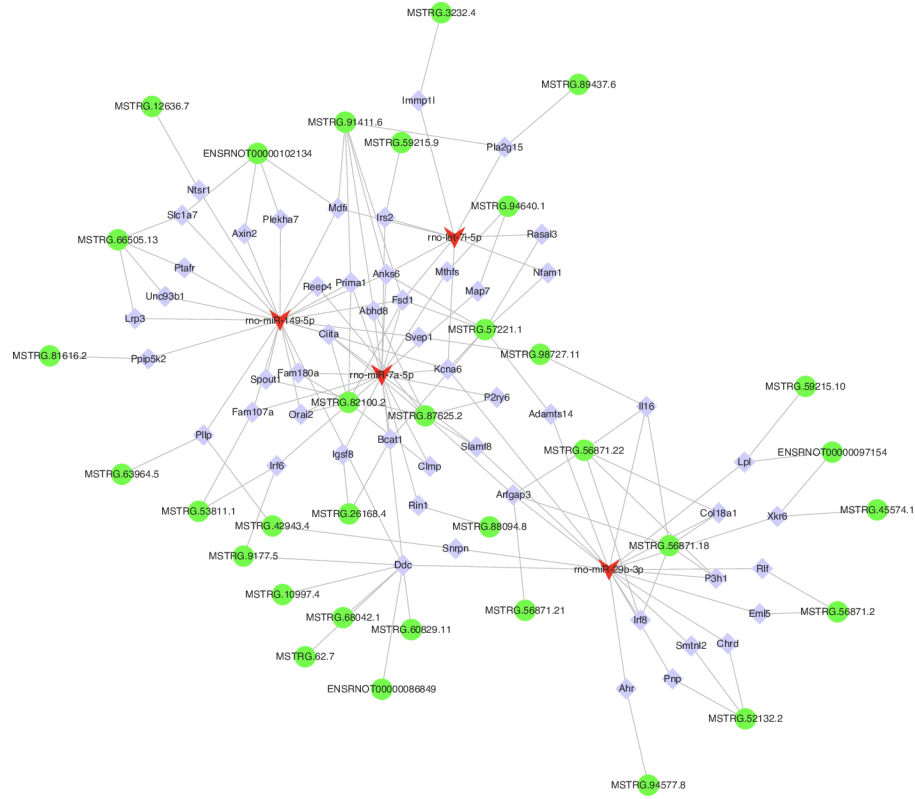

**Supplementary figure 5.** Intersecting miRNAs with differential lncRNA and mRNA constructs of ceRNA networks.

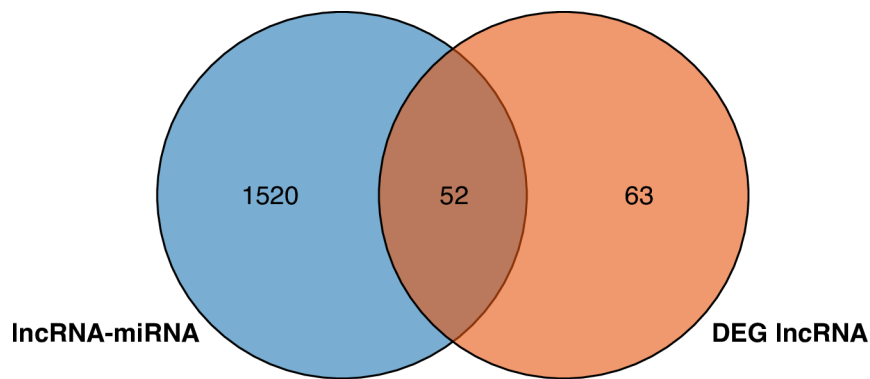

**Supplementary figure 6.** Venn plots of lncRNA vs. differential lncRNA intersections for the 4 miRNAs.

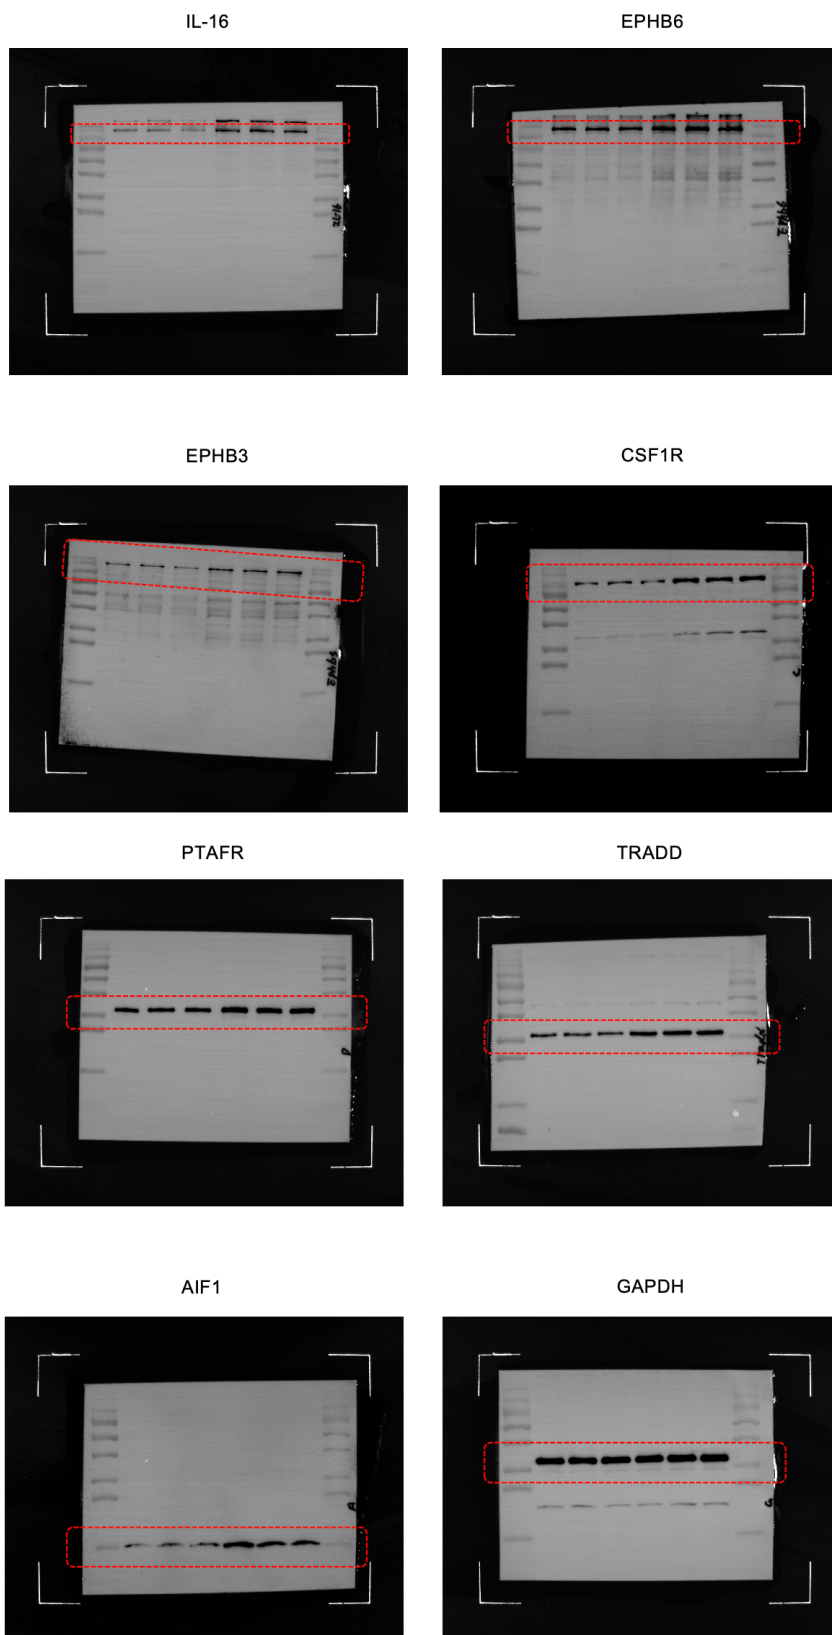

**Supplementary figure 7.** Original image of blots and gels in the article. The original blots were used in figure 8D.
